# Supplementary material for: Uygur type 2 diabetes patient fecal microbiota transplantation disrupts blood glucose and bile acid levels by changing the ability of the intestinal flora to metabolize bile acids in C57BL/6 mice
Source: PubMed Central journal article supplement (PMC9503279; doi:10.1186/s12902-022-01155-8), 2022-09-23
Supplement: 12902_2022_1155_MOESM1_ESM.pdf [file 12902_2022_1155_MOESM1_ESM.pdf]

**Uygurs Type 2 diabetes patient fecal microbiota transplantation  
disrupts blood glucose and bile acid levels by changing the ability of  
the intestinal flora to metabolize bile acids in C57BL/6 mice**

Chanyue Wang<sup>a</sup>, Ye Wang<sup>a</sup>, Hao Yang<sup>a</sup>, Zirun Tian<sup>a</sup>, Manli Zhu<sup>a</sup>,  
Xiaoting Sha<sup>a</sup>, Ju Ran<sup>a</sup>, Linlin Li<sup>a,b,c\*</sup>

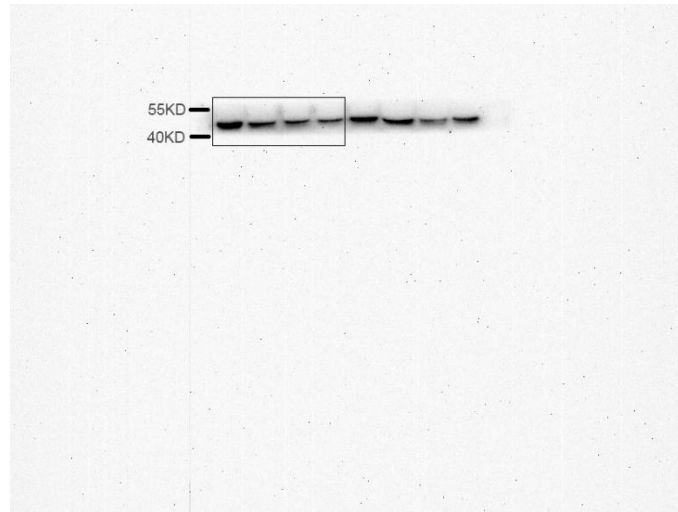

original full-length blot of Figure 8 liver VDR

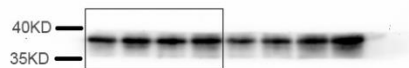

original full-length blot of Figure 8 liver GAPDH

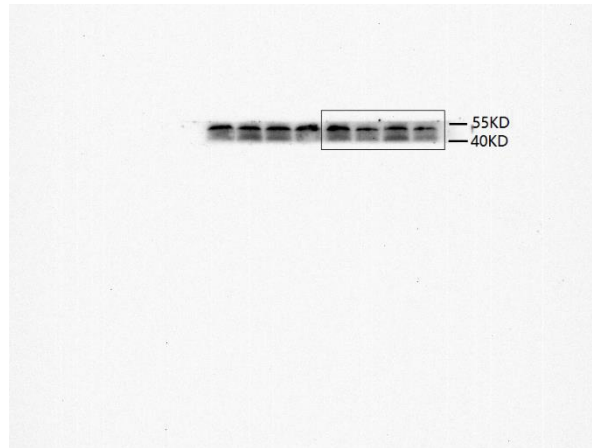

original full-length blot of Figure 8 ileum VDR

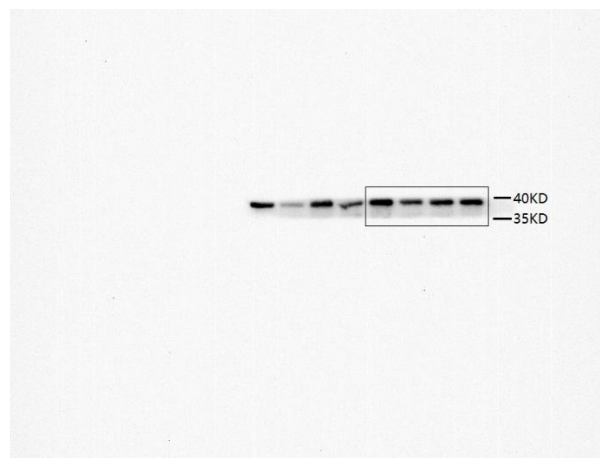

original full-length blot of Figure 8 ileum GAPDH

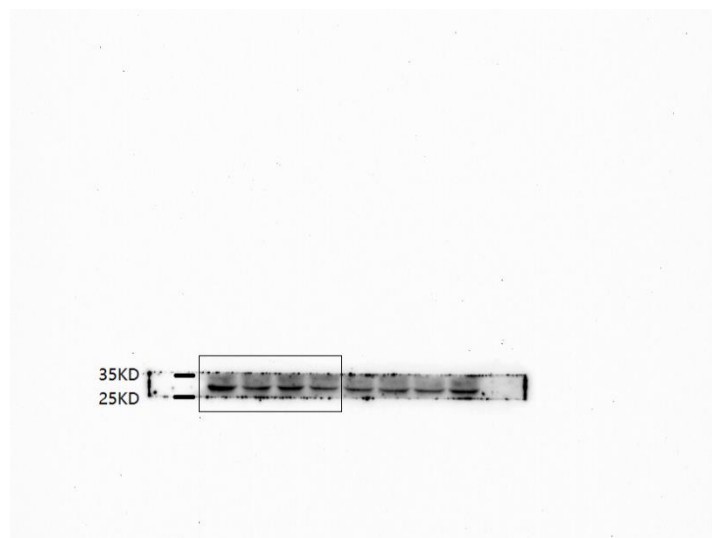

original full-length blot of Figure 9 ileum GLP-1

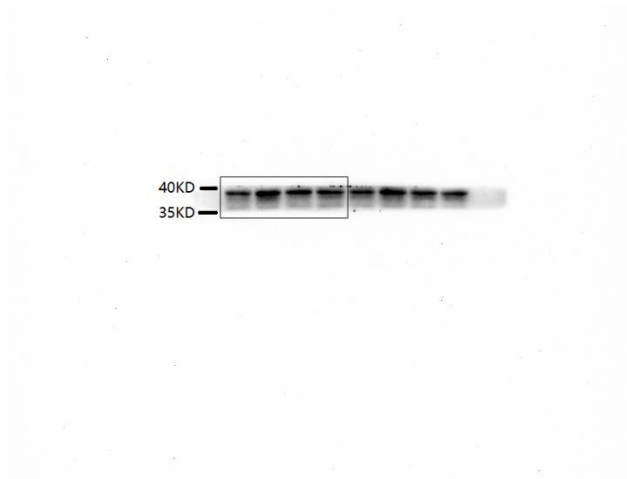

original full-length blot of Figure 9 ileum GAPDH
